# Supplementary material for: Genetic and Molecular Characterization of a Self-Compatible Brassica rapa Line Possessing a New Class II S Haplotype
Source: MDPI journal article supplement (doi:10.3390/plants10122815), 2021-12-20
Supplement: s1 [file s1]

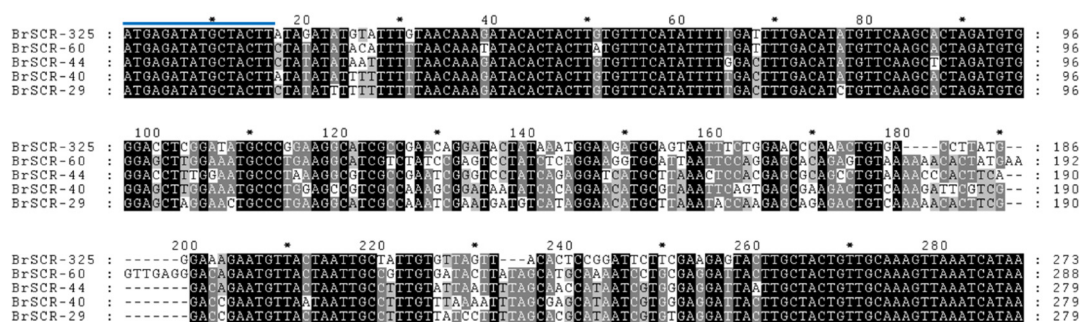

Figure S1. Multiple nucleotide sequence alignment of the class II SCRs.

The blue overline and underline indicate the specific primer pairs for cloning class II SCRs.

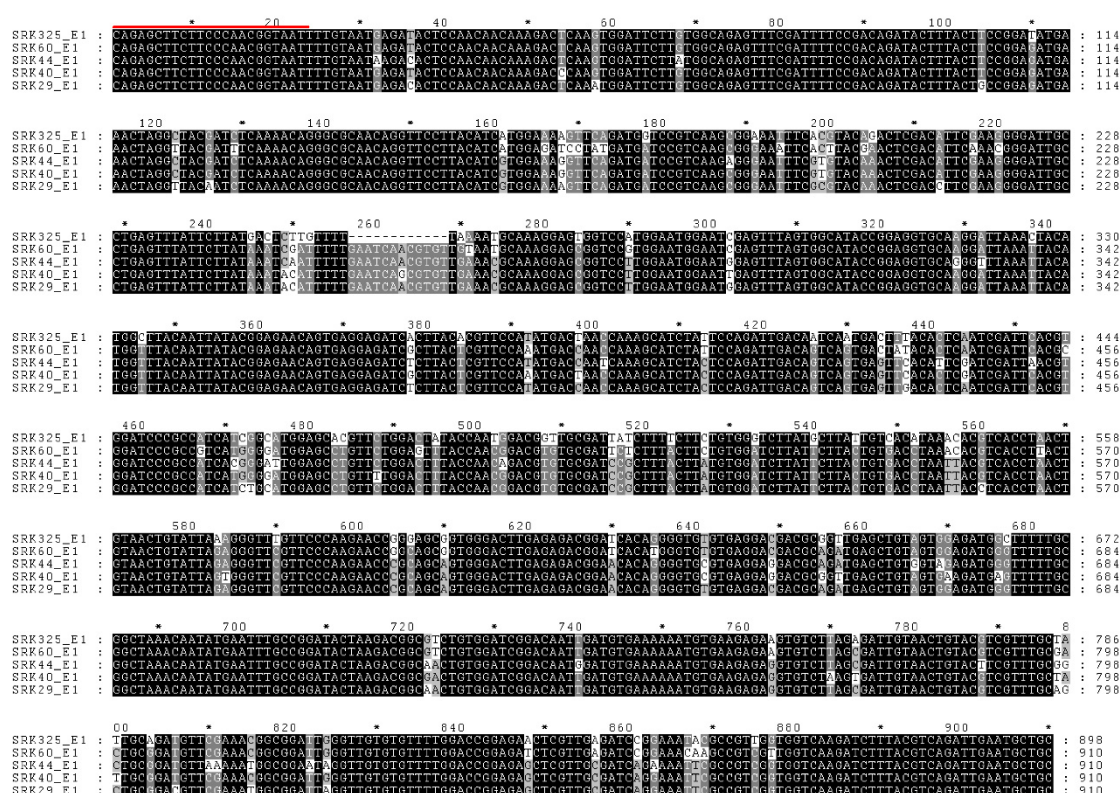

Figure S2. Multiple nucleotide sequence alignment of the first exon in class II SRKs.

The red overline and underline indicate the specific primer pairs for cloning the first exon in class II SRKs.

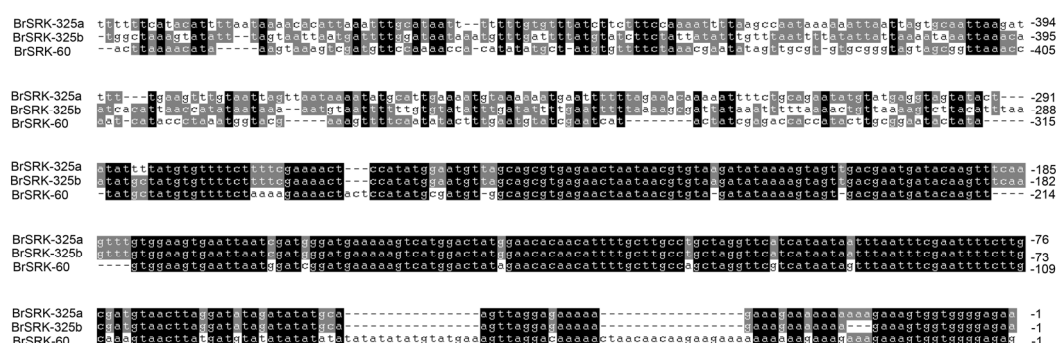

Figure S3. Promoter sequence alignment of class II SRKs.

500 bp promoter sequence alignment of *BrSRK-325a/b* and *BrSRK-60*. The black padding indicated conserved nucleotides.

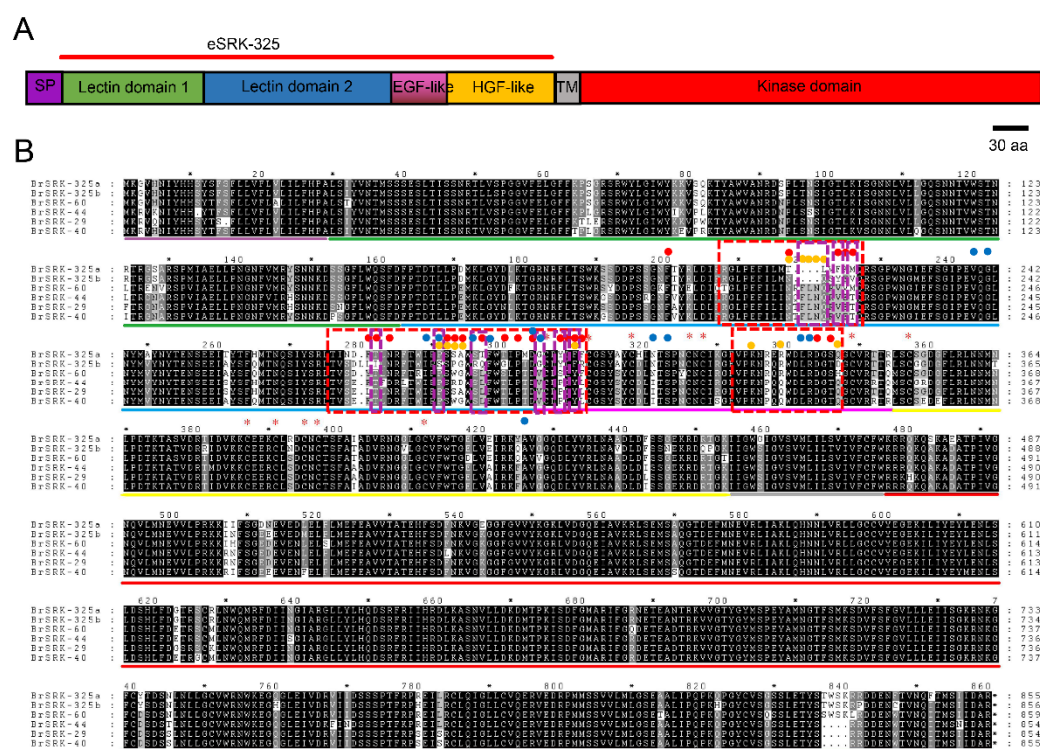

Figure S4. Multiple amino acid sequence alignment of class II SRKs. (A) The structure drawing of BrSRK-325a. The BrSRK-325a was comprised of Lectin domain 1, Lectin domain 2, EGF-like and HGF-like. (B) Sequence alignment of class II SRKs. The different color underlines represented the aforementioned domains in (A). The conserved residues were highlighted in black padding. The hypervariable regions (HV I, HV II, HV III) sequence alignment of class II SRK. Above the alignment, contact amino acids against the cognate SCR were shown red circles, based on the same sites contacting amino acids of BrSRK-8 and BrSRK-9 and yellow circles, based on the contacting amino acids of class II SRK. The blue circles indicated the residues involved in SRK homo-dimerization. The variable amino acids of BrSRK-325a comparing with other class II SRK were shown by purple dotted boxes.

Table S1. Statistics for the genome assembly results of the self-compatible line '325'.

| Mode                              | Total length<br>(bp) | Total<br>number | Total number<br>(≥ 2 kb) | max<br>length(bp) | N50 (bp)  | N90 (bp) | GC<br>content(%) |
|-----------------------------------|----------------------|-----------------|--------------------------|-------------------|-----------|----------|------------------|
| NextDenovo assembly <sup>a</sup>  | 440,847,141          | 547             | 547                      | 22,190,325        | 2,715,399 | 283,704  | 37.3             |
| assembly+racon <sup>b</sup>       | 442,737,300          | 547             | 547                      | 22,291,483        | 2,729,615 | 285,420  | 37.3             |
| assembly+racon+pilon <sup>c</sup> | 443,142,766          | 547             | 547                      | 22,322,820        | 2,732,951 | 285,731  | 37.3             |

purge\_haplotigs<sup>d</sup> 376,699,982 314 314 22,322,776 4,545,633 414,265 36.8

a: The three-generation reads were assembled by NextDenovo. b: The third-generation polish was corrected by racon. c: The second-generation polish was corrected by pilon. d: The corrected assembly genome was removed redundancy by purge-haplotigs.

**Table S2.** Statistic for the sequencing results of the genome assembly.

|                 | Contig Length(bp) | Contig Number | Scaffold Length(bp) | Scaffold Number |
|-----------------|-------------------|---------------|---------------------|-----------------|
| N90             | 414,265           | 153           | 414,265             | 153             |
| N80             | 808,654           | 85            | 808,654             | 85              |
| N70             | 1,415,163         | 49            | 1,415,163           | 49              |
| N60             | 2,670,592         | 29            | 2,670,592           | 29              |
| N50             | 4,545,633         | 19            | 4,545,633           | 19              |
| Total length    | 376,699,982       | -             | 376,699,982         | -               |
| Number(>=100bp) | -                 | 314           | -                   | 314             |
| Number(>=2kb)   | -                 | 314           | -                   | 314             |
| Max length      | 22,322,776        | -             | 22,322,776          | -               |

**Table S3.** Blasting the second-generation reads and third-generation reads of the genome assembly.

| Comparison reads | Sample name | Mapping rate(%) | Average sequencing depth | Coverage (%) | Coverage at least 4X(%) | Coverage at least 10X(%) | Coverage at least 20X(%) |
|------------------|-------------|-----------------|--------------------------|--------------|-------------------------|--------------------------|--------------------------|
| Illumina         | 325         | 99.39           | 175                      | 97.79        | 96.97                   | 96.18                    | 95.32                    |
| Nanopore         | 325         | 99.99           | 192.32                   | 99.98        | 99.89                   | 99.75                    | 99.54                    |

**Table S4.** Statistics of genome completeness in the SC pak choi genome assemblies according to BUSCO.

| Type                                | Proteins | Percentage(%) |
|-------------------------------------|----------|---------------|
| Complete BUSCOs (C)                 | 1,404    | 97.5          |
| Complete and single-copy BUSCOs (S) | 1,219    | 84.65         |
| Complete and duplicated BUSCOs (D)  | 185      | 12.85         |
| Fragmented BUSCOs (F)               | 11       | 0.76          |
| Missing BUSCOs (M)                  | 25       | 1.74          |
| Total BUSCO groups searched         | 1,440    | 100           |

**Table S5.** Statistics of repetitive sequences in the self-compatible line '325'.

| RepBase TEs   |             |            | TE Proteins |            | De novo     |            | Combined TEs |            |
|---------------|-------------|------------|-------------|------------|-------------|------------|--------------|------------|
| Type          | Length (bp) | %in Genome | Length (bp) | %in Genome | Length (bp) | %in Genome | Length (bp)  | %in Genome |
| DNA           | 15,508,528  | 4.12       | 4,125,037   | 1.1        | 51,954,234  | 13.79      | 58,747,051   | 15.6       |
| LINE          | 14,419,054  | 3.83       | 7,504,021   | 1.99       | 13,888,988  | 3.69       | 24,355,860   | 6.47       |
| SINE          | 28,364      | 0.01       | 0           | 0          | 221,319     | 0.06       | 249,650      | 0.07       |
| LTR           | 43,712,246  | 11.6       | 27,079,092  | 7.19       | 115,232,035 | 30.59      | 120,387,356  | 31.96      |
| Satellite     | 13,328,924  | 3.54       | 0           | 0          | 2,782,621   | 0.74       | 14,747,078   | 3.91       |
| Simple_repeat | 0           | 0          | 0           | 0          | 270         | 0          | 270          | 0          |
| Other         | 1,053       | 0          | 231         | 0          | 0           | 0          | 1,284        | 0          |
| Unknown       | 74,781      | 0.02       | 16,668      | 0          | 12,768,814  | 3.39       | 12,850,035   | 3.41       |
| Total         | 86,487,370  | 22.96      | 38,719,738  | 10.28      | 184,646,876 | 49.02      | 198,340,146  | 52.65      |

**Table S6.** Statistics of gene annotation in the self-compatible line '325'.

| Gene set                             | Protein coding gene number | Average gene length (bp) | Average CDS length (bp) | Average exon per gene | Average exon length (bp) | Average intron length (bp) |
|--------------------------------------|----------------------------|--------------------------|-------------------------|-----------------------|--------------------------|----------------------------|
| denovo/GlimmerHMM                    | 60,336                     | 2,513                    | 1,717                   | 3.66                  | 468.9                    | 299.17                     |
| denovo/AUGUSTUS                      | 46,407                     | 1,959                    | 1,122                   | 5.18                  | 216.73                   | 200.44                     |
| homo/Brassica_rapa                   | 36,781                     | 2,560                    | 962.24                  | 3.46                  | 278.34                   | 650.41                     |
| homo/Arabidopsis_thaliana            | 57,090                     | 1,945                    | 802.91                  | 3.16                  | 253.73                   | 527.6                      |
| homo/Brassica_oleracea_var_oleracea  | 28,367                     | 2,681                    | 934.64                  | 3.57                  | 262.15                   | 680.76                     |
| homo/Arabidopsis_lyrata_subsp_lyrata | 47,154                     | 2,439                    | 907.79                  | 3.3                   | 274.71                   | 664.47                     |
| homo/Brassica_napus                  | 30,295                     | 5,817                    | 913.98                  | 2.95                  | 309.44                   | 2,510                      |
| trans.orf/RNAseq                     | 22,374                     | 2,841                    | 1,254                   | 6.28                  | 291.93                   | 190.49                     |
| BUSCO                                | 1,619                      | 2,676                    | 1,546                   | 8                     | 193.32                   | 161.38                     |
| MAKER                                | 38,308                     | 2,912                    | 1,169                   | 5.29                  | 371.92                   | 220.7                      |
| HiCESAP                              | 43,855                     | 2,650                    | 1,121                   | 5                     | 361.02                   | 211.69                     |

Table S7. Statistics the genes functional annotation in the self-compatible line '325'.

|           |             | Number | Percent (%) |
|-----------|-------------|--------|-------------|
| Total     |             | 43,855 |             |
| Annotated |             | 42,500 | 96.91       |
|           | InterPro    | 32,788 | 74.76       |
|           | GO          | 22,496 | 51.3        |
|           | KEGG_ALL    | 41,373 | 94.34       |
|           | KEGG_KO     | 15,174 | 34.6        |
|           | Swissprot   | 28,849 | 65.78       |
|           | TrEMBL      | 42,255 | 96.35       |
|           | TF          | 3,067  | 6.99        |
|           | Pfam        | 32,022 | 73.02       |
|           | NR          | 42,132 | 96.07       |
|           | KOG         | 35,718 | 81.45       |
|           | Unannotated | 1,355  | 3.09        |

Table S8. Statistics of non-coding RNA annotation in the self-compatible line '325'.

| Type  | Copy     | Average length(bp) | Total length(bp) | % of genome |
|-------|----------|--------------------|------------------|-------------|
| miRNA | 241      | 129                | 31,143           | 0.008267    |
| tRNA  | 1,431    | 75                 | 107,296          | 0.028483    |
| rRNA  | rRNA     | 1,623              | 756,185          | 0.200739    |
|       | 18S      | 514                | 584,105          | 0.155058    |
|       | 28S      | 381                | 73,932           | 0.019626    |
|       | 5.8S     | 328                | 50,704           | 0.01346     |
|       | 5S       | 400                | 47,444           | 0.012595    |
| snRNA | snRNA    | 1,397              | 156,197          | 0.041465    |
|       | CD-box   | 1,118              | 118,073          | 0.031344    |
|       | HACA-box | 102                | 12,961           | 0.003441    |
|       | splicing | 174                | 24,847           | 0.006596    |
|       | scaRNA   | 3                  | 316              | 0.000084    |

Table S9. Statistics of gene annotation completeness in the SC pak choi assembled genome according to BUSCO.

| Type | Proteins | Percentage (%) |
|------|----------|----------------|
|------|----------|----------------|

|                             |       |      |
|-----------------------------|-------|------|
| Complete BUSCOs             | 1,411 | 98   |
| Complete Single-Copy BUSCOs | 1,205 | 83.7 |
| Complete Duplicated BUSCOs  | 206   | 14.3 |
| Fragmented BUSCOs           | 12    | 0.8  |
| Missing BUSCOs              | 17    | 1.2  |
| Total BUSCO groups searched | 1,440 | 100  |

**Table S10.** Functions prediction of *S* locus and boundary regions in *BrS*-325.

| Gene ID             | Prediction function                                             |
|---------------------|-----------------------------------------------------------------|
| <i>Bra0024300.1</i> | Putative transcription factor bHLH086 (AtbHLH86)                |
| <i>Bra0024310.1</i> | Domain of unknown function (DUF4228)                            |
| <i>Bra0024320.1</i> | Polyadenylation and cleavage factor homolog 5                   |
| <i>Bra0024330.1</i> | A1 cistron-splicing factor AAR2                                 |
| <i>Bra0024340.1</i> | Methionyl-tRNA formyltransferase                                |
| <i>Bra0024350.1</i> | A S-adenosyl-L-methionine:carboxyl methyltransferase            |
| <i>Bra0024360.1</i> | E3 ubiquitin-protein ligase SINA-like 4                         |
| <i>Bra0024370.1</i> | ATP-dependent Clp protease proteolytic subunit 3                |
| <i>Bra0024380.1</i> | Protein-lysine N-methyltransferase                              |
| <i>Bra0024385.1</i> | <i>S</i> locus protein 11                                       |
| <i>Bra0024390.1</i> | <i>S</i> receptor kinase                                        |
| <i>Bra0024395.1</i> | <i>S</i> receptor kinase                                        |
| <i>Bra0024396.1</i> | <i>S</i> -locus-specific glycoprotein                           |
| <i>Bra0024400.1</i> | SAM dependent carboxyl methyltransferase                        |
| <i>Bra0024410.1</i> | DNA ligase 6 Brassica rapa                                      |
| <i>Bra0024420.1</i> | Anti-silencing function 1a protein ( <i>S</i> -locus protein 7) |
| <i>Bra0024430.1</i> | Cyclin-dependent kinase D-2(CDK2)                               |
| <i>Bra0024440.1</i> | Protein DETOXIFICATION 7 (MATE protein 7)                       |
| <i>Bra0024450.1</i> | Protein DETOXIFICATION 7 (MATE protein 7)                       |
| <i>Bra0024460.1</i> | Protein DETOXIFICATION 9 (MATE protein 9)                       |

**Table S11.** Amino acid sequence similarity of class II SCR.

| Name      | BrSCR-325 | BrSCR-60 | BrSCR-44 | BrSCR-40 | BrSCR-29 |
|-----------|-----------|----------|----------|----------|----------|
| BrSCR-325 | 100%      |          |          |          |          |
| BrSCR-60  | 59.38%    | 100%     |          |          |          |
| BrSCR-44  | 56.99%    | 64.58%   | 100%     |          |          |
| BrSCR-40  | 58.06%    | 63.54%   | 68.82%   | 100%     |          |
| BrSCR-29  | 59.14%    | 64.58%   | 69.89%   | 73.12%   | 100%     |

**Table S12.** Amino acid sequence similarity of class II SRK.

| Name       | BrSRK-325a | BrSRK-325b | BrSRK-60 | BrSRK-44 | BrSRK-40 | BrSRK-29 |
|------------|------------|------------|----------|----------|----------|----------|
| BrSRK-325a | 100%       |            |          |          |          |          |
| BrSRK-325b | 92.88%     | 100%       |          |          |          |          |
| BrSRK-60   | 90.23%     | 89.90%     | 100%     |          |          |          |
| BrSRK-44   | 87.67%     | 87.92%     | 90.58%   | 100%     |          |          |
| BrSRK-40   | 88.95%     | 89.08%     | 91.40%   | 94.28%   | 100%     |          |
| BrSRK-29   | 89.19%     | 89.31%     | 91.51%   | 94.62%   | 91.40%   | 100%     |

**Table S13.** The genes information of the known class II SRK and SCR in *B. rapa* and *B. oleracea*.

| gene name       | GenBank/entry name | gene name       | GenBank/entry name |
|-----------------|--------------------|-----------------|--------------------|
| <i>BrSCR-29</i> | AB067449.1         | <i>BrSRK-29</i> | AB008191.1         |
| <i>BrSCR-40</i> | AB067450.1         | <i>BrSRK-40</i> | AB211197.1         |
| <i>BrSCR-44</i> | AB067451.1         | <i>BrSRK-44</i> | AB211198.1         |
| <i>BrSCR-60</i> | AB067446.1         | <i>BrSRK-60</i> | AB032474.1         |
| <i>BoSCR-15</i> | AB024416           | <i>BoSRK15</i>  | Q9XFW5/Y18259      |
| <i>BoSCR-5</i>  | Q8S9C1             | <i>BoSRK-5</i>  | Y18259/Q9T0M1      |
| <i>BoSCR-2b</i> | Q8S9C2             | <i>BoSRK-2b</i> | AB024416           |

Table S14. Primers designed to detect the S haplotypes based on the SLG, SRK and SCR sequence.

| No | primer    | sequence(5'-3')                | length | source                     | S haplotype | Species            |
|----|-----------|--------------------------------|--------|----------------------------|-------------|--------------------|
| 1  | PS5       | ATGAAAGGCGTAAGAAAAACCT<br>A    | 23     | SLG-8 (1–23)               | class I     | <i>B. rapa</i>     |
|    | PS15      | CCGTGTTTTATTTAAGAGAAAG<br>AGCT | 27     | SLG-6 (1,336–1,310)        | class I     | <i>B. oleracea</i> |
| 2  | PK1       | CTGCTGATCATGTTCTGCCTCTG<br>G   | 24     | Second exon of SRK<br>gene | class I     | <i>B. oleracea</i> |
|    | PK4       | CAATCCCAAAATCCGAGATCT          | 21     | Fifth exon of SRK<br>gene  | class I     | <i>B. oleracea</i> |
| 3  | PS3       | ATGAAAGGGGTACAGAACAT           | 20     | SLG-2A (1–20)              | class II    | <i>B. oleracea</i> |
|    | PS21      | CTCAAGTCCCACTGCTGCGG           | 20     | SLG-2A (1,025–1,006)       | class II    | <i>B. oleracea</i> |
| 4  | SRKII-E1L | CAGAGCTTCTTCCCAACGGTAAT<br>T   | 24     | SRK-60 (404–427)           | class II    | <i>B. rapa</i>     |
|    | SRKII-E1R | GCAGCATTCAATCTGACGTAAA<br>GA   | 24     | SRK-60 (1290–1313)         | class II    | <i>B. rapa</i>     |
| 5  | SRKII-E4L | TCTTGTCGACTTCTTGGCTGTT         | 23     | SRK-60 (6894–6916)         | class II    | <i>B. rapa</i>     |
|    | SRKII-E7R | CGTCAATGATCGACATGGTGATT        | 23     | SRK-60 (7928–7950)         | class II    | <i>B. rapa</i>     |
| 6  | IISCR-1L  | TCATAAGTCATGAGATATGCTAC<br>TT  | 25     | SCR-60 (-9–16)             | class II    | <i>B. rapa</i>     |
|    | IISCR-1R  | TTATGATTAACTTTGCAACAGT<br>AGC  | 26     | SCR-60 (260–288)           | class II    | <i>B. rapa</i>     |

Table S15. Primers designed to detect the expression of SRK and SCR.

| No | primer         | sequence(5'-3')            | length | Use               |
|----|----------------|----------------------------|--------|-------------------|
| 1  | SRK-12 RT-1F   | AGGATATCCGGAATTACATTGGCAAC | 26     | <i>BrSRK-12</i>   |
|    | SRK-12 RT-1R   | GATTGTGTCATCCCGTTCATAAGTAC | 26     |                   |
| 2  | SCR-12 RT-1F   | AGTCGTTCTCAAGAATTAACAGAAG  | 25     | <i>BrSCR-12</i>   |
|    | SCR-12 RT-1R   | TTAGCATTTACATGTACAAAGCCGTC | 26     |                   |
| 3  | SCR-325 RT-1F  | TGTAACAAAGATACTACTTGTGT    | 25     | <i>BrSCR-325</i>  |
|    | SCR-325 RT-1R  | ACTCTTCGAAGAATCCGGAGTGT    | 23     |                   |
| 4  | SRK-325b RT-1F | CGGCTGATGTTTCGAAATGGAGT    | 22     | <i>BrSRK-325b</i> |
|    | SRK-325b RT-1R | CCAGGTTGGTCCCTCTTCTCATTC   | 21     |                   |
| 5  | SRK-325a RT-1F | GCAGATGTTTCGAAACGGCGG      | 20     | <i>BrSRK-325a</i> |
|    | SRK-325a RT-1R | CAGTTCGGTCTCTCTTCTCACC     | 22     |                   |
| 6  | SRK-325 RT-1F  | TGGTCAAGATCTTTACGTCAGATTG  | 25     | <i>BrSRK-325</i>  |
|    | SRK-325 RT-1R  | GCTTGCTTCTGTCTCCTCTTCC     | 22     |                   |
| 7  | Actin-1F       | CTATCCTCCGTCTCGATCTCGC     | 22     | <i>Actin 7</i>    |
|    | Actin-1R       | CTTAGCCGTCTCCAGCTCTTGC     | 22     |                   |
